# Supplementary material
Source: PubMed Central journal article supplement (PMC2716646)
Supplement: mmc1.pdf [file mmc1.pdf]

Biophysical Journal, Volume 96

**Supporting Material**

**Pressure-induced changes in the structure and function of the kinesin-microtubule complex**

Masayoshi Nishiyama, Yoshifumi Kimura, Yoshio Nishiyama, and Masahide Terazima

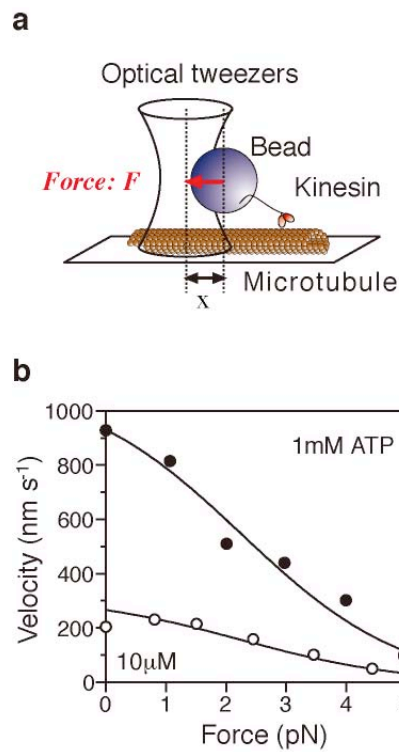

FIGURE S1

**Nanometry of single kinesin molecules.**

(a) Schematic diagram of the optical trapping nanometry system (not to scale). A bead attached to a single kinesin molecule was trapped by an infrared laser beam and brought into contact with a microtubule fixed on a glass surface. The displacement of the bead,  $x$ , was measured with nanometer accuracy. The force of kinesin,  $F$ , was calculated from the bead displacement and multiplied by the trap stiffness. (b) Force-velocity relations in the presence of 1mM (filled circles) and 10 $\mu$ M (open circles) ATP. The plots were obtained from the time course of single kinesin molecules (S1).

S1. Nishiyama, M., H. Higuchi, and T. Yanagida. 2002. Chemomechanical coupling of the forward and backward steps of single kinesin molecules. *Nature Cell Biol.* 4:790-797.

## **Supporting Video legend**

**Video S1** Microtubule shortening at 150 MPa. Fluorescence images of immobilized microtubule at 150 MPa were recorded with 30 sec intervals for 10 minutes. Video play back is 150x real-time.
